# Supplementary material
Source: HighWire-hosted journal article supplement (https://spcare.bmj.com/content/14/e1/e504)
Supplement: inline-supplementary-material-2 [file inline-supplementary-material-2.pdf]

|                                        | <b>Total<br/>population<br/>(N=20)</b> | <b>Standard<br/>Cancer Care<br/>(n=11)</b> | <b>Standard<br/>Cancer<br/>Care Plus<br/>Palliative<br/>Care (n=9)</b> |
|----------------------------------------|----------------------------------------|--------------------------------------------|------------------------------------------------------------------------|
| <b>Days<br/>Hospitalized</b>           | 18.8                                   | 22.2                                       | 14.7                                                                   |
| <b>Cycles<br/>Chemo</b>                | 4.2                                    | 6.4                                        | 3                                                                      |
| <b>Fractions<br/>Radiotherapy</b>      | 7.5                                    | 8.6                                        | 6.2                                                                    |
| <b>Surgery</b>                         | 0.9                                    | 0.9                                        | 0.85                                                                   |
| <b>MRI</b>                             | 0.7                                    | 0.6                                        | 0.75                                                                   |
| <b>CT</b>                              | 2.2                                    | 2.2                                        | 2.1                                                                    |
| <b>OPD visits</b>                      | 18.3                                   | 19.4                                       | 17.1                                                                   |
| <b>Total<br/>Hospital<br/>Costs*</b>   | 40,430/979.7<br>0                      | 53,588/1330.5                              | 24,349/604.<br>6                                                       |
| <b>Out of<br/>pocket<br/>payments*</b> | 5810/140.8                             | 7,768/192.8                                | 4,271/106.1                                                            |
| <b>Lost wages*</b>                     | 74,900/1814.<br>9                      | 120,591/2994.2                             | 36,238/899.<br>7                                                       |
| <b>Palliative<br/>Care Costs*</b>      | 765.5/19.1                             | N/A                                        | 765.5/19.1                                                             |
| <b>Waiver<br/>holder</b>               | 9(45%)                                 | 5(50%)                                     | 4(44%)                                                                 |

|                                        |          |           |          |
|----------------------------------------|----------|-----------|----------|
| Stage III or IV disease<br>(Number, %) | 18 (90%) | 11 (100%) | 7(77.8%) |
| Alive at study end                     | 10 (50%) | 7 (64%)   | 3 (33%)  |
