# Supplementary material
Source: HighWire-hosted journal article supplement (https://spcare.bmj.com/content/14/e1/e504)

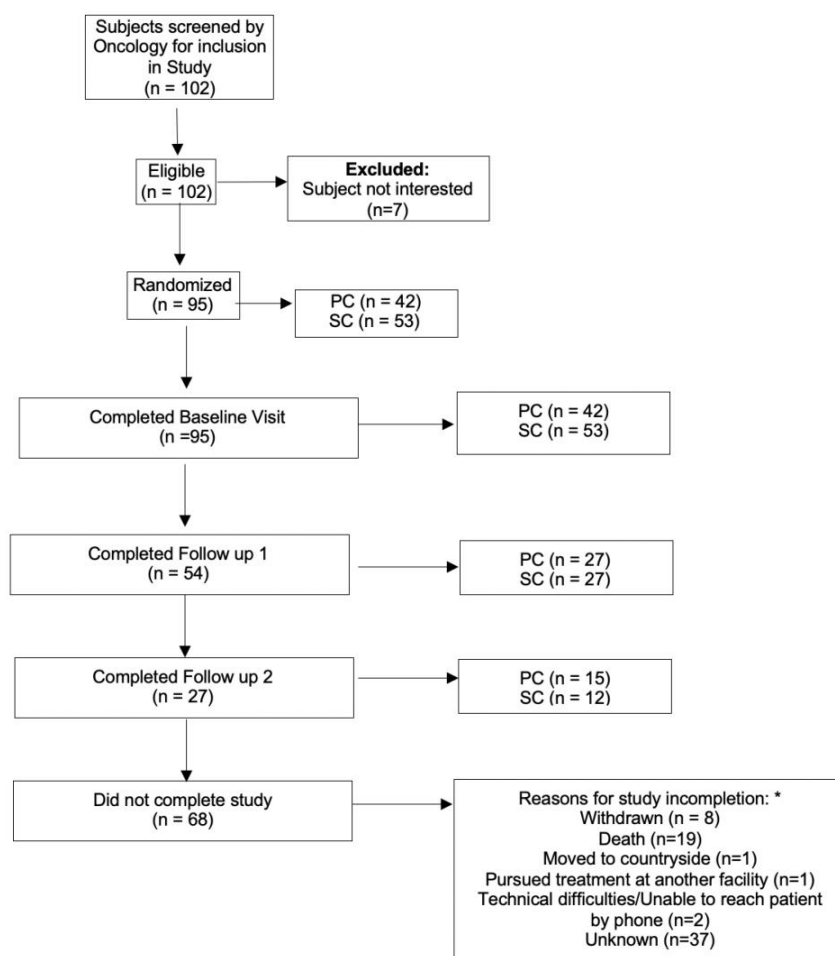

Supplement: inline-supplementary-material-1 [file inline-supplementary-material-1.pdf]
